1 **Title: Insects pollinated flowering plants for most of angiosperm evolutionary history**  
2 **Authors:** Ruby E. Stephens<sup>1,2\*</sup>, Rachael V. Gallagher<sup>1,3</sup>, Lily Dun<sup>2,4</sup>, Will Cornwell<sup>4</sup>, Hervé  
3 Sauquet<sup>2,4</sup>

4 \* Corresponding author: [stephenseruby@gmail.com](mailto:stephenseruby@gmail.com)

5  
6 **Author addresses:**

7 <sup>1</sup>School of Natural Sciences, Macquarie University, Sydney, Australia

8 <sup>2</sup>National Herbarium of New South Wales (NSW), Royal Botanic Gardens and Domain Trust,  
9 Sydney, Australia

10 <sup>3</sup>Hawkesbury Institute for the Environment, Western Sydney University, Sydney, Australia

11 <sup>4</sup>Evolution and Ecology Research Centre, University of New South Wales, Sydney, Australia

12

13 **ORCIDs**

14 0000-0002-3767-2690 Ruby E. Stephens

15 0000-0002-4680-8115 Rachael Gallagher

16 0000-0002-0712-5143 Lily Dun

17 0000-0003-4080-4073 Will Cornwell

18 0000-0001-8305-3236 Hervé Sauquet

19

20 **Word counts:**

21 **Total:** 4,932

22 **Summary:** 200 words

23 **Introduction:** 646 words

24 **Materials and Methods:** 1,213 words, 1 table

25 **Results:** 829 words (exc. legends), 5 figures, 8 pages Supporting Information

26 **Discussion:** 2,032 words

27

## 28 **Summary**

29

- 30 • Pollination is a fundamental process driving the speciation of angiosperms (flowering  
31 plants). Most contemporary angiosperms are insect pollinated, but abiotic pollination by  
32 wind or water and vertebrate pollination by birds or mammals occurs in many lineages.  
33 We model the evolution of pollination across angiosperms and quantify the timing and  
34 environmental associations of pollination shifts.
- 35 • We use a robust dated phylogeny and trait-independent species-level sampling across all  
36 families of angiosperms to model the evolution of pollination modes. Data on the  
37 pollination system or syndrome of 1160 species were collated from primary literature.
- 38 • Angiosperms were ancestrally insect pollinated, and insects have pollinated angiosperms  
39 for approximately 86% of angiosperm evolutionary history. Wind pollination evolved at  
40 least 42 times, with few reversals back to animal pollination. Transitions between insect  
41 and vertebrate pollination were more frequent: vertebrate pollination evolved at least 39  
42 times from an insect pollinated ancestor with at least 26 reversals. The probability of  
43 wind pollination increases with habitat openness (measured by Leaf Area Index) and with  
44 distance from the equator.
- 45 • Our reconstruction of pollination across angiosperms sheds light on a key question in  
46 angiosperm macroevolution, highlighting the long history of interactions between insect  
47 pollinators and angiosperms still vital to global biodiversity today.

48

49 **Keywords (5-8):** angiosperms, flowering plants, insects, macroecology, macroevolution,  
50 pollination, pollination syndromes.

## 51 **1 Introduction**

52

53 Pollination is a fundamental ecological process that has influenced the diversification of many  
54 seed plant families throughout evolutionary history (Ollerton *et al.*, 2019; Asar *et al.*, 2022).

55 Both gymnosperms and angiosperms depend on pollination to reproduce sexually, with pollen  
56 transfer effected by insects, vertebrates, wind or water as vectors (Faegri & van der Pijl, 1979).

57 Shifts between different pollinators are often implicated in the speciation of closely related  
58 plants, and in the angiosperms pollination shifts have driven the evolution of the vast array of  
59 floral forms present today (van der Niet & Johnson, 2012; van der Niet *et al.*, 2014).

60

61 Precisely how the first angiosperms were pollinated, and how pollination modes have evolved  
62 through time, remains a key question in angiosperm macroevolution (Sauquet & Magallón,  
63 2018). The majority of angiosperms are pollinated by animals, especially insects (e.g. bees, flies,  
64 wasps, moths, butterflies, beetles, thrips) but also vertebrates (e.g. birds, bats, lizards, small  
65 mammals) (Faegri & van der Pijl, 1979; Ollerton *et al.*, 2011). Indeed, although some flowers  
66 self-pollinate, up to a third of angiosperms set no seed at all without animal pollination (Rodger  
67 *et al.*, 2021). However, abiotic pollination by wind or water also occurs in many diverse plant  
68 lineages, and wind pollination is estimated to have evolved at least 65 times across the  
69 angiosperms (Linder, 1998; Ackerman, 2000). Combined pollination by animals and wind  
70 (ambophily) is also found in many unrelated lineages, and may be more common than currently  
71 reported as it is rarely tested for in pollination studies (Culley *et al.*, 2002; Abrahamczyk *et al.*,  
72 2022a).

73

74 It is widely believed that the most recent common ancestor of the angiosperms was insect  
75 pollinated (Hu *et al.*, 2008; Labandeira & Currano, 2013; Gottsberger, 2016; Asar *et al.*, 2022).

76 This is supported by the predominance of insect pollination in extant early-diverging  
77 angiosperms and in fossil seed plants (Hu *et al.*, 2008; Friis *et al.*, 2011; Asar *et al.*, 2022),

78 though extant early-diverging angiosperms also include wind pollinated (e.g. *Trithuria*  
79 *submersa*, Taylor *et al.*, 2010) and ambophilous taxa (e.g. *Amborella trichopoda*, Thien *et al.*,

80 2003). Ancestral pollination is yet to be explored on the full angiosperm phylogeny, however,  
81 and questions persist about the timing and tempo of pollination mode evolution. For instance, it

82 is not yet known when shifts to wind pollination occurred, and whether these were as common as  
83 shifts between insect and vertebrate pollinators. Yet to be explored also is the frequency of  
84 reversals from wind back to animal pollination, and how the ancestors of all major angiosperm  
85 clades may have been pollinated.

86

87 The environmental conditions that have accompanied shifts between pollination modes across  
88 angiosperm evolution also remain unclear. Despite macroecological evidence that wind  
89 pollination decreases towards the equator (Ollerton *et al.*, 2011; Rech *et al.*, 2016), evolutionary  
90 studies show no relationship between wind pollination and geographical distribution (Friedman  
91 & Barrett, 2008). Wind pollination appears to have evolved more often in open habitats,  
92 however, where pollen is more easily airborne, and is less common today in warm, wet and  
93 species rich environments (Friedman & Barrett, 2008; Rech *et al.*, 2016). Given these mixed  
94 ecological and evolutionary relationships, whether shifts to wind pollination have consistently  
95 been associated with shifts between habitats or major biomes during angiosperm evolution bears  
96 further investigation.

97

98 Here we quantify major changes in the evolution of pollination modes across a robust dated  
99 phylogeny (Ramírez-Barahona *et al.*, 2020), and an unprecedented suite of trait-independent  
100 species-level observations across all families and major subfamilies of angiosperms. We estimate  
101 the rate and timing of transitions between insect, vertebrate, wind and water pollination, and  
102 reconstruct the ancestral pollination modes of major angiosperm lineages. We also use this  
103 dataset to quantify macroecological patterns of animal versus wind pollination in a phylogenetic  
104 framework. Specifically, we ask whether emergent relationships between wind pollination and  
105 latitude or habitat openness (as measured by Leaf Area Index, LAI) remain when angiosperm  
106 evolutionary history is considered.

107

## 108 **2 Materials and Methods**

109

### 110 **2.1 Scoring pollination mode**

111

112 Pollination system or syndrome was scored for 1201 species across 434 plant families contained  
113 in the angiosperm phylogeny of Ramírez-Barahona *et al.* (2020). Where possible pollination was  
114 scored at species level (n = 1025), cross-checked against what is known of pollination in that  
115 genus and family, especially from the Kubitzki series (Kubitzki *et al.*, 1993–2018). Where no  
116 information was available for a particular species they were scored at genus (n = 131), or family  
117 (n = 4) level. We obtained pollination data for 1160 of 1201 taxa, using the best available  
118 evidence to score the pollination system (n = 432) or syndrome (n = 728) for each taxon. Where  
119 possible, explicit studies of pollination ecology in a taxon’s native range were preferred (n =  
120 239), especially if these involved explicit tests for the occurrence of wind pollination (45 of  
121 these). Where these data were not available, we used records of floral visitation in combination  
122 with an interpretation of species floral syndrome (n = 193).

123

124 Where no field observations had been recorded, we interpreted species floral syndrome sensu  
125 Faegri & van der Pijl (1979) (n = 728). Although pollination syndromes can be inaccurate at fine  
126 taxonomic levels (Ollerton *et al.*, 2009; van der Niet, 2021), they are effective predictors of the  
127 broad pollination groups used here (Rosas-Guerrero *et al.*, 2014; Dellinger, 2020), especially  
128 wind pollination which has a well-defined suite of traits (Friedman & Barrett, 2008). Floral  
129 syndrome was interpreted from species descriptions, illustrations and images from various  
130 sources, including iNaturalist and eFloras (eFloras, 2022; iNaturalist, 2022), and informed by  
131 pollination syndrome data from trait databases including TRY (Kattge *et al.*, 2020), BiolFlor  
132 (Kühn *et al.*, 2004), and AusTraits (Falster *et al.*, 2021). Full references are available in  
133 Supporting Information.

134

135 Floral syndrome was scored by considering all available evidence. To separate wind from animal  
136 pollinated flowers we assessed traits in Table 1 of Friedman & Barrett (2009) and pollen as  
137 described in Hu *et al.* (2008), particularly perianth size and colour, gynoecium size and shape,  
138 pollen and floral rewards (Table 1). To separate insect from vertebrate pollination syndromes we  
139 considered floral size and the robustness of floral parts, nectar quantity and the accessibility of  
140 floral rewards to different pollinators (e.g. the presence of poricidal anthers which only release  
141 pollen when vibrated by bees in buzz-pollinated flowers (Pritchard & Vallejo-Marín, 2020),

142 Table 1). Water pollination was considered in the rare cases where plants had an aquatic habit  
143 and flowered near or under water (Ackerman, 2000).

144

145 *Table 1 Some of the key floral traits used to assign species pollination syndromes, in addition to all other available evidence.*

| <b>Trait</b> | <b>Wind</b>                                   | <b>Insect</b>                                                      | <b>Vertebrate</b>                 |
|--------------|-----------------------------------------------|--------------------------------------------------------------------|-----------------------------------|
| Scent        | Absent                                        | Often present                                                      | Present (mammal) or absent (bird) |
| Nectar       | Absent                                        | Often present                                                      | Present, abundant                 |
| Pollen       | Dry, smooth, small, abundant, easily airborne | Sticky, clumped, larger, sometimes available via poricidal anthers | Sticky, clumped, larger           |
| Perianth     | Plain or reduced                              | Often present and brightly coloured                                | Present, robust                   |
| Gynoecium    | Feathery or with increased surface area       | -                                                                  | -                                 |
| Sexuality    | Often unisexual                               | Often bisexual                                                     | Often bisexual                    |

146

147 Flowers were scored as polymorphic where there was evidence for more than one pollination  
148 mode, or where they were pollinated by animals but it was unclear whether this was vertebrate or  
149 insect pollination (n = 76). Where there was no evidence that pollination via external vectors  
150 occurred (in clonal or autogamous species) or no information was available these species were  
151 left as missing data (n = 41). Our final dataset included pollination information for 1160 of the  
152 1201 species in 433 families (all except Hoplestigmataceae) in the Ramírez-Barahona *et al.*  
153 (2020) angiosperm tree. Fully referenced data are available at  
154 <https://doi.org/10.5281/zenodo.7592528>.

155

156 2.2 Ancestral state reconstructions and stochastic character mapping

157

158 Data processing and analysis was completed in R version 4.1.3 (R Core Team, 2022) using  
159 packages including the *tidyverse* collection (Wickham *et al.*, 2019), *ape* version 5.6.2 (Paradis &

160 Schliep, 2019), *corHMM* version 2.8 (Boyko & Beaulieu, 2021) and *phytools* version 1.0.3  
161 (Revell, 2012).

162

163 For analyses we used a dated phylogeny from Ramírez-Barahona *et al.* (2020), specifically the  
164 maximum clade credibility time-tree reconstructed in BEAST using the ‘relaxed calibration  
165 strategy’ with one prior constraint on the crown age of angiosperms and 238 fossil-based  
166 minimum age constraints (‘RC-complete analysis’). To reconstruct ancestral pollination modes  
167 and estimate rates of transition between pollination modes we compared two Markov models via  
168 a maximum likelihood approach in *corHMM*: Equal Rates (ER) where all transition rates are  
169 equal and All Rates Different (ARD) where all transition rates differ. Pollination modes were  
170 separated into four states: wind, water, insect and vertebrate. Ancestral state reconstructions were  
171 run first with a model distinguishing among these four states (4-state model) and then with  
172 various simpler models combining these states into fewer categories (e.g. abiotic (wind or water)  
173 versus animal (insect or vertebrate) pollination, Supporting Information Table S1) to reduce the  
174 number of parameters in the models and to allow the possibility of ancestral polymorphisms.  
175 *corHMM* analyses were run with 10 random restarts using the default Yang root prior (Yang,  
176 2006) and marginal node state reconstruction.

177

178 To estimate the timing and number of transitions between different pollination modes we used  
179 stochastic character mapping via the *makeSimmap* function in *corHMM* (1000 simulations  
180 across the tree for each state combination considered). Stochastic character mapping assessed all  
181 pollination states (wind-water-insect-vertebrate), as well as wind versus animal and vertebrate  
182 versus insect pollination. Taxa missing data were dropped from the phylogeny for wind-animal  
183 and vertebrate-insect analyses. To assess the impact of dating uncertainty on these results, we  
184 also ran stochastic character mapping across 1000 trees sampled from the posterior of Ramírez-  
185 Barahona *et al.* (2020), with 100 simulations on each tree.

186

### 187 2.3 Environmental correlates of wind pollination

188

189 To test for relationships between spatial and environmental variables and wind pollination we  
190 sourced occurrence data (latitude-longitude coordinates) from the Global Biodiversity

191 Information Facility (GBIF) for the 1201 taxa in our dataset (filtered from GBIF.org, 2022).  
192 Occurrences were cleaned by retaining only records with an associated herbarium specimen  
193 collected since 1980, and using the package CoordinateCleaner version 2.0-20 (Zizka *et al.*,  
194 2019) to remove geographic outliers, non-land records, country-coordinate mismatches, points  
195 near known herbaria, botanic gardens, and country capitals, duplicated records, and points with  
196 identical longitude and latitude. Cleaning used the computational resources from the Katana  
197 computing cluster at UNSW (<https://doi.org/10.26190/669x-a286>).

198

199 Using occurrence data, we calculated the absolute mean latitude of each species range (distance  
200 from the equator) and a metric of habitat openness based on Leaf Area Index (LAI) across the  
201 range. LAI is defined as one half of the total green leaf area per unit horizontal ground surface  
202 area and is measured at frequent intervals to track plant growth responses, which change with  
203 seasonal and climatic conditions (Fang *et al.*, 2019). LAI is highest in densely forested areas  
204 such as the Amazon rainforest and lowest in arid open areas such as the Sahara desert, and is an  
205 objective continuous measure of the openness of species habitat (Liu *et al.*, 2012; Fang *et al.*,  
206 2019). We took one average of LAI from GLOBMAP data for July 1981- December 2020 (Liu  
207 *et al.*, 2012), and extracted mean LAI for each GBIF occurrence, then averaged these for each  
208 species to provide a metric of species mean habitat openness.

209

210 To test whether wind pollination is more frequently associated with higher latitudes or open  
211 habitats we used phylogenetic logistic regression fitted in *phylolm* version 2.6.2 (Tung Ho &  
212 Ané, 2014) following the Ives and Garland method (Ives & Garland, 2010). Uncertainty of  
213 parameter estimates was estimated by 100 parametric bootstrap samples. 180 taxa with missing  
214 or polymorphic data were excluded from this analysis, giving final sample size  $n = 1021$ .

215

216 To test whether the evolution of wind pollination in angiosperms was correlated with shifts  
217 between major biomes we ran Pagel's (1994) models of correlated evolution, see Supporting  
218 Information Notes S1 for details.

219

## 220 **3 Results**

221



222 Angiosperms were reconstructed as ancestrally insect pollinated, with all models supporting  
223 insect or animal pollination as the most likely ancestral state at the root of the angiosperm tree  
224 (Figure 1, Supporting Information Table S1). Results hereon are from the wind, water, insect,  
225 vertebrate 4-state model, for which the ARD model had highest support (SI Table S1).  
226  
227 Fifty-seven of 64 angiosperm orders were reconstructed as ancestrally insect pollinated  
228 (proportional marginal likelihoods  $>0.85$ ; Figure 1). Notable exceptions include Ceratophyllales  
229 (water pollinated), Zingiberales (vertebrate pollinated), Fagales (wind pollinated) and  
230 Picramniales (wind pollinated; Figure 1). Two angiosperm clades are primarily water pollinated:  
231 Ceratophyllales and the seagrasses within Alismatales (Ruppiaceae, Cymodoceaceae,  
232 Posidoniaceae, Zosteraceae and Potamogetonaceae; Figure 1, Figure S1). Major wind pollinated  
233 clades include sections of Alismatales, Poales, Rosales, Fagales and Caryophyllales, though  
234 wind pollination occurs at many other points across the angiosperm tree (Figure 1, Figure S1).  
235 Vertebrate pollination is dispersed across the angiosperm tree, with large vertebrate pollinated  
236 clades in the Zingiberales, Bromeliaceae and at the base of the Ericales (Figure 1, Figure S1).  
237 Ancestral states inferred for all angiosperm families and orders can be seen in more detail in  
238 Supporting Information Figure S1.  
239  
240 Transition rates (number of transitions per million years) for the 4-state ARD model were low  
241 overall, with the highest transition rate (0.01) for reversals from vertebrate to insect pollination  
242 (Figure 2). Transition rates from insect to vertebrate pollination were an order of magnitude  
243 lower (0.0007), and rates between vertebrate pollination and wind or water pollination were near  
244 zero ( $<0.00001$ ). The transition rate from insect to wind pollination (0.0007) was an order of  
245 magnitude lower than the reversal (0.001). Transition rates to water pollination were highest  
246 from wind pollination (0.002).  
247  
248 Of the 434 angiosperm families sampled, 327 (75%) were entirely animal pollinated, 37 (9%)  
249 were entirely wind pollinated, 5 (1%) were entirely water pollinated and 64 (15%) families  
250 contain a mix of taxa pollinated by wind, water and/or animals. Three hundred and eighty-nine  
251 (90%) angiosperm families contain some form of animal pollination (384 or 89% by insects) and  
252 100 (23%) families contain some form of wind pollination including ambophily.



254

Pollination modes

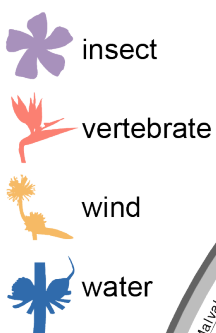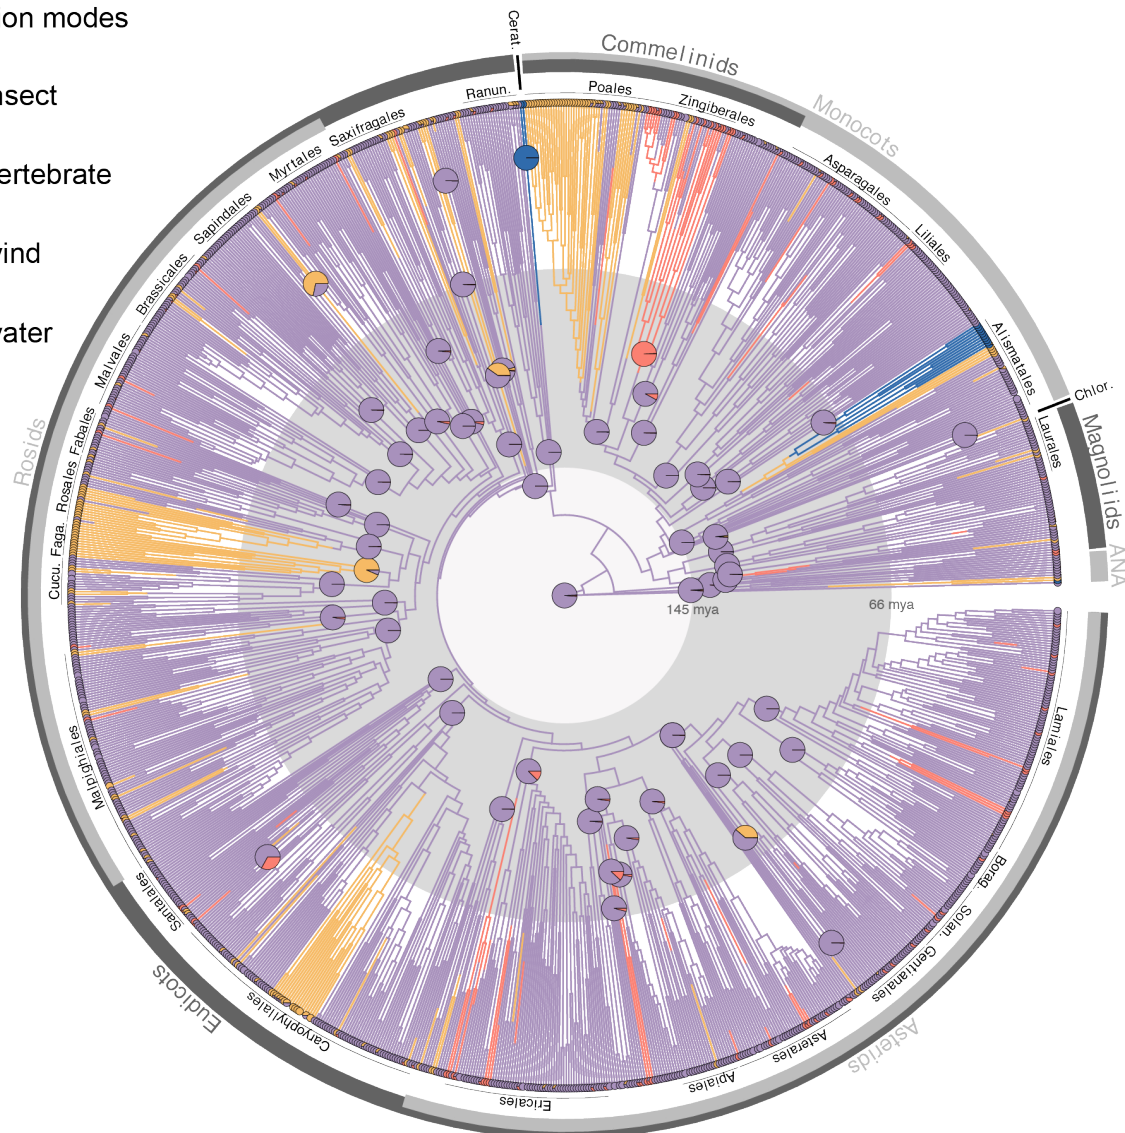

255

256 *Figure 1 The macroevolution of pollination modes across angiosperms, showing the proportional marginal likelihood of*  
 257 *pollination mode at the ancestral nodes for each angiosperm order ( $n = 64$ ) from the 4-state ARD model. Colour along tree*  
 258 *branches indicates pollination mode from one randomly selected stochastic character map of the wind, water, insect, vertebrate*  
 259 *ARD model. 26 major angiosperm orders are labelled: Chlor. = Chloranthales, Cerat. = Ceratophyllales, Ranun. = Ranunculales,*  
 260 *Faga. = Fagales, Cucu. = Cucurbitales, Solan. = Solanales, Borag. = Boraginales. Pie charts at tip labels indicate polymorphic*  
 261 *data. The grey band indicates the period of the Cretaceous from 145 - 66 million years ago, though the timing of angiosperm*  
 262 *evolution remains an area of active research and times displayed are indicative only.*

263

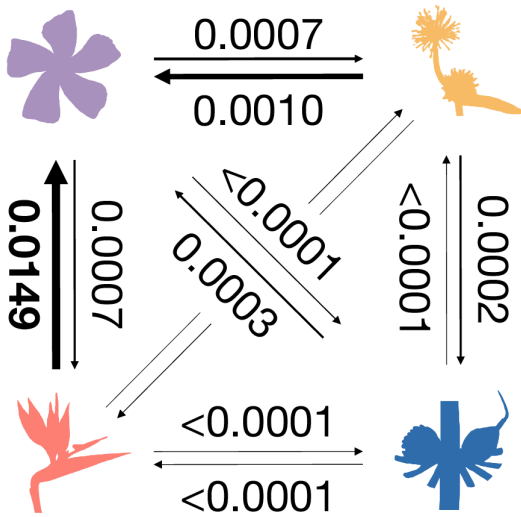

264 *Figure 2 Transition matrix showing transition rates (number of transitions per million years) for the 4-state ARD model;*  
265 *transition rates not displayed on the diagonal between wind and vertebrate pollination are both  $<0.0001$ .*

266

### 267 3.1 Stochastic character mapping

268

269 Stochastic character mapping found more transitions to wind pollination from animal pollination  
270 than the reverse, with a 95% Highest Posterior Density (HPD) interval of 42-50 transitions to  
271 wind and 4-12 reversals back to animal pollination (Figure 3a). In contrast, vertebrate and insect  
272 pollination had frequent transitions to and from, with 95% HPD of 39-56 transitions from insect  
273 to vertebrate pollination and 26-57 reversals from vertebrate back to insect pollination (Figure  
274 3b). Transitions to water pollination occurred only 1-3 times, with no reversals (SI Figure S2).  
275 When averaging the total branch lengths spent in each state across all stochastic character maps,  
276 a mean 86% of angiosperm evolutionary time since the crown node is spent in insect pollination,  
277 10% of evolutionary time in wind pollination, 4% of time in vertebrate pollination and 1% of  
278 time in water pollination.

279

280 Dating uncertainty around the single angiosperm tree used for above analyses had little impact  
281 on these numbers, with stochastic mapping across 1000 trees from the posterior of Ramírez-  
282 Barahona et al. (2020) returning largely congruent results (SI Table S2-S3).

283

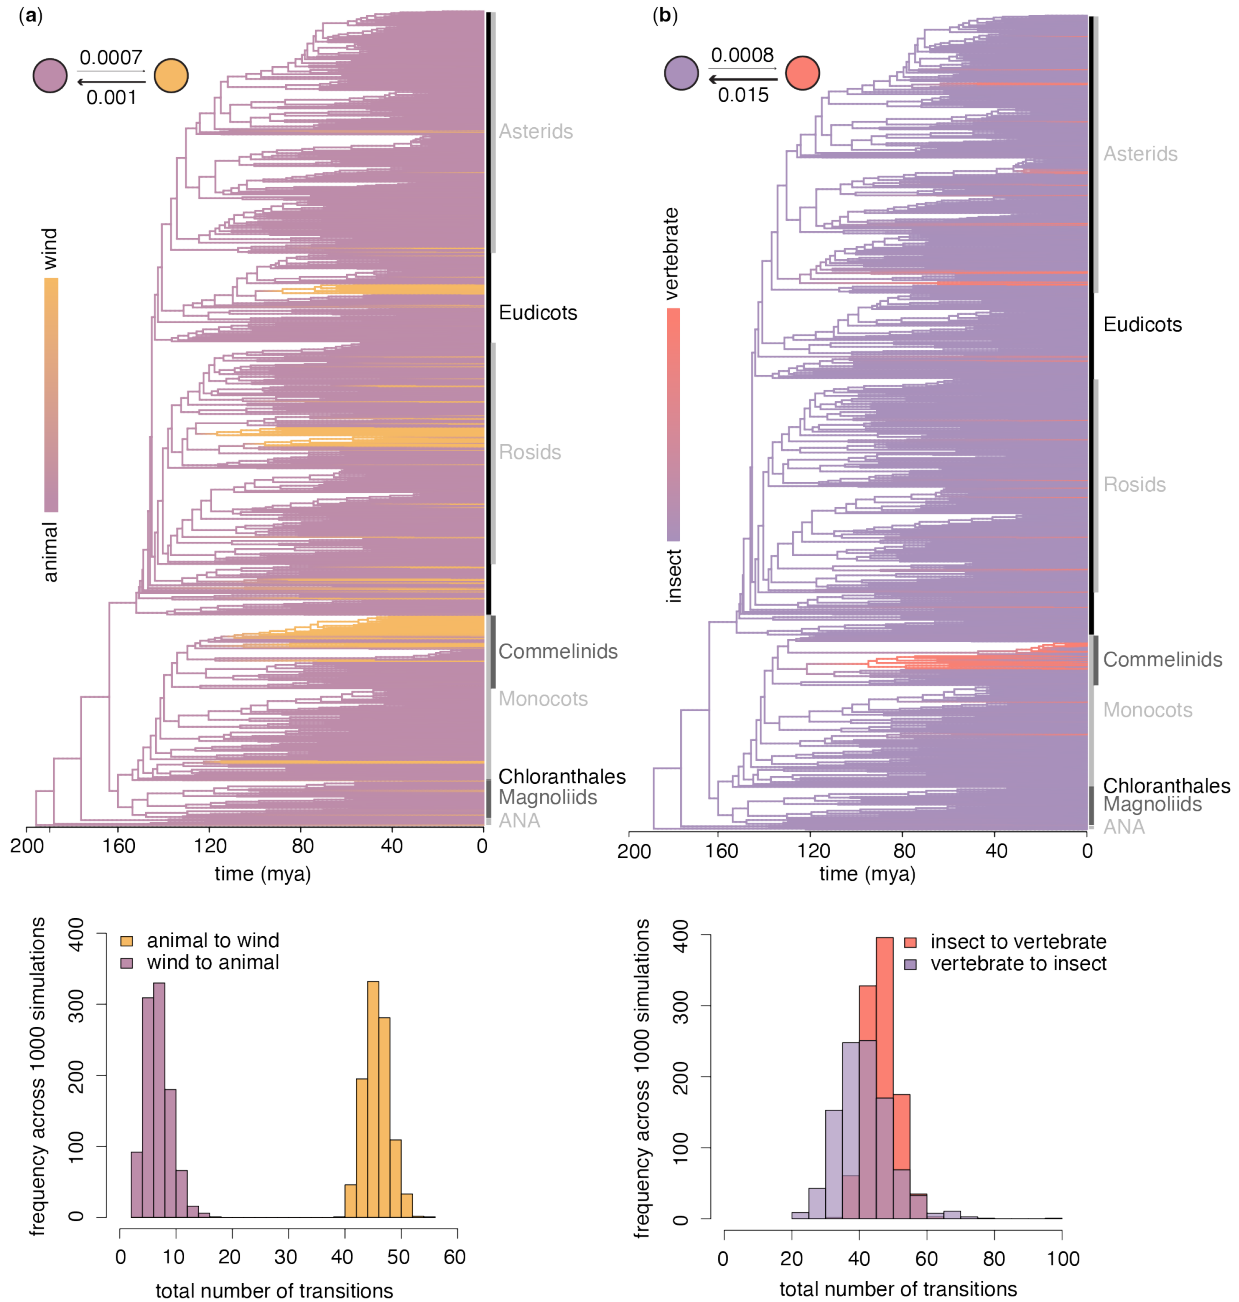

284

285 *Figure 3 Reconstruction of transitions between wind and animal pollination (a) and, within animal pollination, between insect*

286 *and vertebrate pollination (b) across the history of angiosperms. Trees are density maps from 1000 simulated stochastic*

287 *histories based on ARD binary-state models; note that the tree in (b) is a subset of the tree in (a) with all wind pollinated tips*

288 *removed, and water pollinated tips have been removed from both trees. Transition matrices in the top left of each panel indicate*

289 *the transition rates from ancestral state reconstructions for each model. Histograms show the number of transitions between*

290 *each pollination mode across all 1000 simulated stochastic histories.*

291

292 The time of transitions extracted from stochastic mapping suggests that transitions to wind  
293 pollination started early in the evolution of extant angiosperms (reconstructed here as  
294 approximately 197 million years ago, (mya Figure 4a), though the age of angiosperms remains  
295 an area of active research (Sauquet *et al.*, 2022)). Transitions to wind pollination start  
296 approximately 129-131 mya (95% CI), and continue steadily from then on, with a slight decrease  
297 around 80 mya followed by an acceleration towards the present day (Figure 4a). Reversals back  
298 to animal pollination are both fewer and slower than transitions to wind pollination, starting  
299 approximately 76-79 mya with most occurring in the last 40 million years (Figure 4a).  
300 Transitions between insect and vertebrate pollination track each other closely (Figure 4b). The  
301 first transition to vertebrate pollination occurs approximately 126-127 mya, with the first reversal  
302 from vertebrate back to insect pollination 103-106 mya (Figure 4b). Transitions between insect  
303 and vertebrate pollination increase sharply towards the present day (Figure 4b).  
304

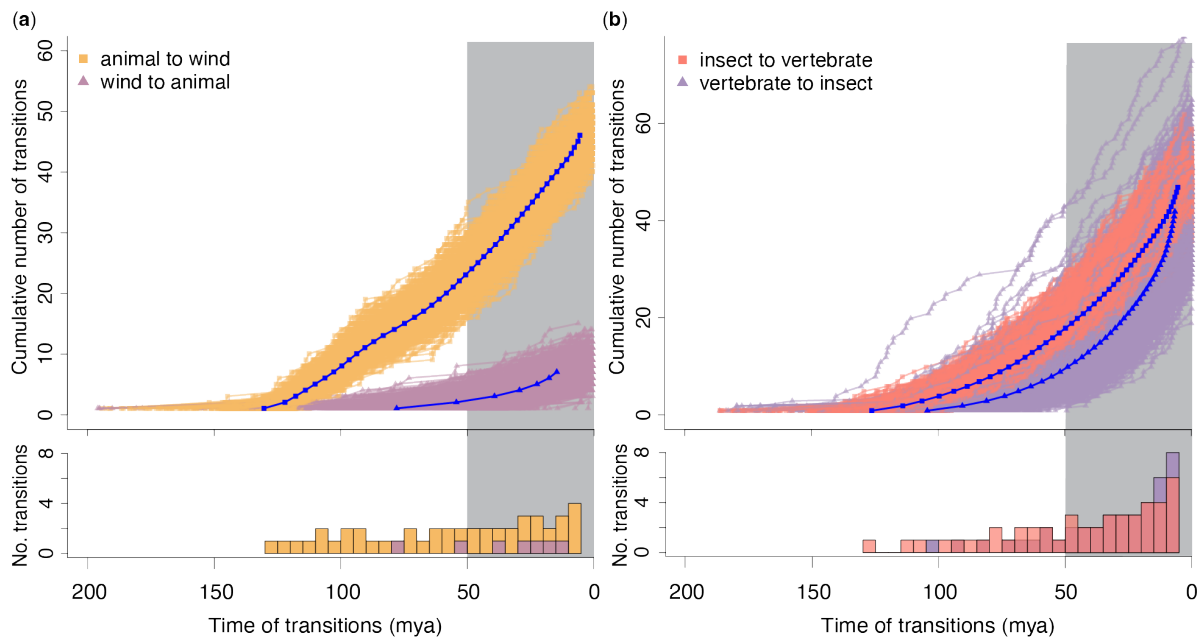

305  
306 *Figure 4 The number and timing of transitions between wind and animal pollination (a) and, within animal pollination, between*  
307 *insect and vertebrate pollination (b) across the history of angiosperms, based on 1000 simulated stochastic histories of ARD*  
308 *binary-state models. Coloured lines show individual stochastic trajectories, blue lines show the mean stochastic trajectory*  
309 *(timing of each transition and total number of transitions). Histograms below the main graphs show the number of transitions in*  
310 *each time period averaged across all simulations. The grey highlight shows the period towards the present where denser species*  
311 *sampling would likely detect stronger trends. The timing of angiosperm evolution remains an area of active research and times*  
312 *displayed are indicative only.*

313

### 314 3.2 Environmental and geographic relationships

315

316 Both wind and animal pollinated species are found at a range of latitudes and across habitats  
317 which are, on average, characterised by a wide range of canopy openness values (mean LAI)  
318 (Figure 5). Species with high (~8) mean LAI were 1.2 times more likely to be animal pollinated  
319 in phylogenetic logistic regression analyses (coefficient = 0.16, confidence interval 0.16–0.27,  $p$   
320 = 0.02,  $n = 1,022$  species; Figure 5a). The probability of wind pollination increased with distance  
321 from the equator (absolute latitude), with species 2% more likely to be wind pollinated with each  
322 1° increase in mean latitude (coefficient = -0.02, confidence interval -0.021 – -0.024,  $p = 0.03$ ,  $n$   
323 = 1,022 species; Figure 5b).

324

325

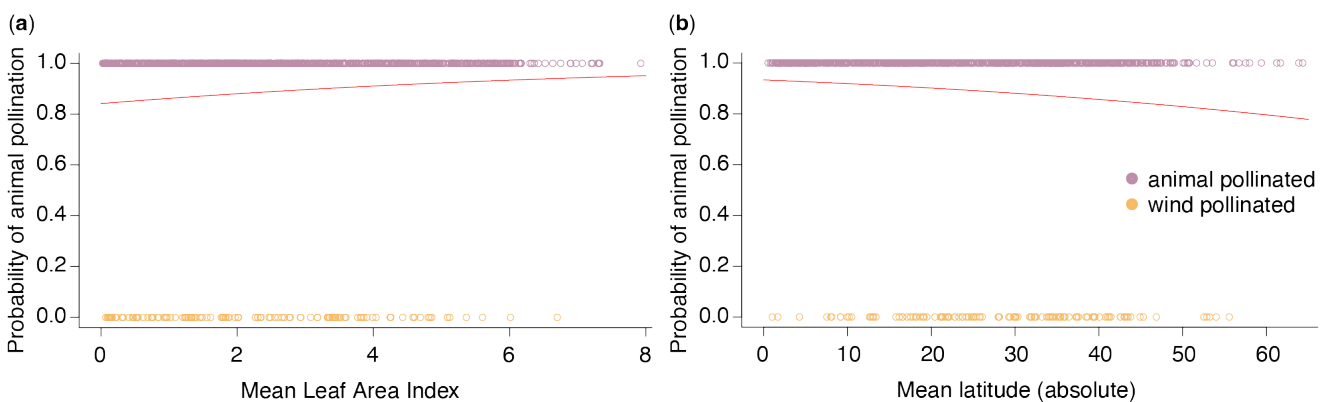

326

327 *Figure 5 The relationship between animal/wind pollination and species mean Leaf Area Index and absolute latitude. Red lines*  
328 *show the coefficient of phylogenetic logistic regressions between wind/animal pollination mode and species mean Leaf Area*  
329 *Index (a) or species mean absolute latitude (b).*

330

331 In contrast, Pagel's models found limited evidence for correlated evolution between superbiome  
332 occupancy and wind versus animal pollination (see Supporting Information Notes S1).

333

## 334 4 Discussion

335

336 Most extant angiosperms are pollinated by insects, and our reconstructions here suggest that the  
337 most recent common ancestor of the angiosperms was also insect pollinated. This accords with  
338 previous inferences of ancestral insect pollination in the angiosperms from the fossil record (Hu  
339 *et al.*, 2008; Friis *et al.*, 2011; Labandeira & Currano, 2013; Asar *et al.*, 2022) and reviews of  
340 pollination in early diverging angiosperm lineages (Hu *et al.*, 2008; Thien *et al.*, 2009;  
341 Gottsberger, 2016). Ancestral insect pollination of angiosperms is further supported by the floral  
342 syndrome of Sauquet *et al.* (2017)'s reconstructed ancestral flower: the bisexual and radially  
343 symmetric flower, with more than two whorls of perianth and stamens is consistent with a  
344 generalist insect pollination syndrome. More detail of ancestral traits such as flower size, pollen  
345 stickiness and the presence of nectaries or nectar drops would be needed to infer this with  
346 certainty, however.

347  
348 Beyond just the angiosperms, evidence is accumulating that the ancestor of all seed plants may  
349 itself have been insect pollinated (Ollerton, 2017; Asar *et al.*, 2022). Though many contemporary  
350 gymnosperms are wind pollinated, particularly the conifers and *Ginkgo biloba*, both extinct and  
351 extant gymnosperm lineages contain many diverse examples of insect pollination (reviewed in  
352 Labandeira & Currano, 2013; Asar *et al.*, 2022). Our strong support for insect pollination at the  
353 angiosperm crown node again raises the question of how far back along the angiosperm stem  
354 insect pollination may have evolved. Definitive answers may be difficult to come by however,  
355 given the long period of angiosperm stem evolution for which we have limited fossil evidence.

356  
357 Pollination by insects has clearly been a successful reproductive strategy throughout angiosperm  
358 history, with 86% of evolutionary time spent in insect pollination on average (Figure 1).

359 Although the origins and diversification of angiosperms and insect pollinators may not be as  
360 tightly linked as previously thought (Asar *et al.*, 2022), theirs is clearly a mutualism of great  
361 antiquity. This long period of interactions between pollinating insects and flowers has enabled  
362 diverse but effective pollination mutualisms to evolve (Friis *et al.*, 2011), with the advantages of  
363 insect pollination for angiosperms noted by evolutionary biologists since Darwin (1876). These  
364 include the abundance of pollinating insects in a broad range of habitats, from arid deserts to  
365 Antarctic islands, though insects are increasingly abundant towards the tropics (Ollerton, 2017).  
366 Another advantage is the relatively small investment in floral rewards necessary to attract insect



367 pollinators, especially small-bodied insects (McCallum *et al.*, 2013). The dependence on floral  
368 rewards by insects such as bees or butterflies, whose entire diet is supplied by nectar and/or  
369 pollen, in turn increases insects' flower constancy, improving the chances of pollen being  
370 transferred between compatible conspecific flowers (Grüter & Ratnieks, 2011). There are of  
371 course some drawbacks to insect pollination, especially as insects are often herbivores and eat  
372 many plant parts, not just the floral rewards provided. There have been suggestions that florivory  
373 may represent a precursor to pollination in some systems though (Xiao *et al.*, 2021), and clearly  
374 the benefits of attracting insect pollinators outweigh the risks of herbivory for the majority of  
375 flowering plants.

376

#### 377 4.1 Pollination transitions

378

379 We show that evolutionary shifts between insect and vertebrate pollination have been frequent  
380 throughout angiosperm history, with at least 39-56 transitions from insect to vertebrate  
381 pollination (Figure 3b). This is consistent with studies which show numerous shifts to bird, bat  
382 and other vertebrate pollination in clades such as Zingiberales and Bromeliaceae (Specht *et al.*,  
383 2012; Kessler *et al.*, 2020), though there has been no angiosperm-wide assessment to our  
384 knowledge. Many of the advantages of insect pollination also apply to pollination by vertebrate  
385 animals. Vertebrate pollination can be an effective mutualism, where vertebrate dependence on  
386 floral rewards promotes flower constancy and thus efficient, targeted cross pollination (Ratto *et*  
387 *al.*, 2018). Vertebrate pollinated flowers are often expensive for a plant to produce, needing  
388 large, robust floral parts and large quantities of pollen and nectar as floral rewards (Fleming *et*  
389 *al.*, 2009; McCallum *et al.*, 2013). In return, vertebrate pollinators can often transport pollen at  
390 greater distances than insect pollinators, thus increasing gene flow and reducing the chance of  
391 inbreeding depression for some vertebrate pollinated plants (Fleming *et al.*, 2009; Wessinger,  
392 2021). In fact, early evidence suggest that vertebrate (hummingbird) pollination is favoured in  
393 self-incompatible plants (Abrahamczyk *et al.*, 2022b). It remains to be seen whether this pattern  
394 is general, such that the advantage of better outcrossing outweighs the cost of greater floral  
395 investment for vertebrate-pollinated species.

396

397 Our reconstructions suggest that reversals from vertebrate to insect pollination have been almost  
398 as frequent as the original transitions (Figure 3b). This is at odds with some studies which show  
399 strong specialisation and a lack of reversibility in vertebrate pollinated species, such as in  
400 hummingbird pollinated genera (Barrett, 2013). Other studies suggest vertebrate pollination can  
401 be more generalised, especially outside the tropics (Ratto *et al.*, 2018). Indeed, our data  
402 contained numerous instances of species pollinated by both insects and vertebrates: for example,  
403 *Lapageria rosea* (Philesiaceae, Liliales) is pollinated by both hummingbirds and large  
404 bumblebees (Valdivia *et al.*, 2006). Although some vertebrate pollination systems are highly  
405 specialised, others are clearly more general, and the traits separating insect from vertebrate  
406 pollination syndromes may be relatively labile. Both vertebrate and insect pollination require  
407 plants to provide floral rewards, particularly nectar, to have sticky pollen, and to attract animal  
408 pollinators with a showy perianth or similar (Faegri & van der Pijl, 1979). Floral traits separating  
409 insect from vertebrate pollination, such as flower size and colour or nectar volume, can be  
410 environmentally plastic and phylogenetically variable (e.g. McEwen & Vamosi, 2010;  
411 Parachnowitsch *et al.*, 2019), suggesting that these characters may be relatively easy for plants to  
412 change. Our results question the narrative that vertebrate pollination is highly specialised and  
413 irreversible, perhaps reflecting the fact that most pollination systems are general in nature (Waser  
414 *et al.*, 1996), despite the increased research attention specialisation receives.

415  
416 In contrast to vertebrate and insect pollination, reversals from wind to animal pollination are rare  
417 (Figure 3a). Transitions to wind pollination require significant changes in floral traits, such as the  
418 reduction or removal of the perianth and nectaries, shift to unisexuality and dioecy, increase in  
419 the pollen:ovule ratio and changes to style morphology (Friedman & Barrett, 2009). Though  
420 none of these traits are irreversible, the tightly correlated constellation of traits may be difficult  
421 to reverse all together to return to successful cross-pollination by animals. Ambophily may play  
422 a transitional role in such instances, though ambophily has evolved more frequently from insect  
423 than wind pollinated ancestors (Abrahamczyk *et al.*, 2022a). Where reversals from wind to  
424 animal pollination do occur, they typically involve a transition to generalist insect pollination  
425 (Barrett, 2013). For example, in the predominantly wind pollinated genus *Cyperus*, *C.*  
426 *sphaerocephalus* (Cyperaceae, Poales) has colourful bracts, pollen sticky with pollenkitt and a  
427 floral scent which attracts flies, beetles and bees, setting few seeds when insects but not wind are

428 excluded (Wragg & Johnson, 2011). *Cyperus* flowers are mostly bisexual, and this co-occurrence  
429 of anthers and stigmas in flowers probably facilitates reversals to insect pollination in bisexual  
430 taxa (Wragg & Johnson, 2011), especially given the tendency of insects to collect pollen from  
431 wind-pollinated flowers (Saunders, 2018). In fact, though dioecy is occasionally reversible  
432 (Wang *et al.*, 2021), the separation of plant sexes may be the most significant barrier to wind-  
433 animal reversals. Insects taking pollen from male flowers may never even visit female flowers,  
434 and thus are less likely to incidentally pollinate dioecious or diclinous wind-pollinated plants.  
435 Thus, reproductive barriers may contribute to the rarity of reversals from wind to animal  
436 pollination.

437

438 Despite the large number of necessary trait changes, many shifts from animal to wind pollination  
439 have occurred throughout angiosperm evolution. Our simulation of at least 42-50 transitions  
440 from animal to wind pollination accords with previous estimates of at least 65 shifts across the  
441 angiosperms (Linder, 1998), and is likely an underestimate given our subsampling approach.  
442 Major transitions to wind pollination have led to large wind pollinated clades in the Alismatales,  
443 Poales, Rosales, Fagales and Caryophyllales (Figure 1). Although it has long been suggested that  
444 wind pollination is less effective than insect pollination (e.g. Darwin, 1876), wind pollination has  
445 clearly been a successful strategy for these clades, and they have evolved diverse mechanisms to  
446 improve its efficiency (Friedman & Barrett, 2009). What drove these shifts to wind pollination  
447 remains unclear, though our exploration of environmental correlates provides some clues. Wind  
448 pollination is believed to evolve when animal pollination is limited or unreliable and the abiotic  
449 environment is conducive to wind flow (Culley *et al.*, 2002; Friedman & Barrett, 2009).  
450 Significant habitat and climatic changes through angiosperm history may have opened habitats  
451 and disrupted access to pollinators, not least the Cretaceous-Paleogene extinction event (Asar *et al.*,  
452 2022). Indeed, we find wind pollination is more probable in open habitats with low Leaf  
453 Area Index as well as locations further from the equator (Figure 5), both places with higher wind  
454 flow and lower pollinator activity (Rech *et al.*, 2016; Ollerton, 2017). We also find tentative  
455 evidence for correlated evolution between shifts to wind pollination and arid biomes, though  
456 deeper sampling of wind pollinated arid taxa is needed to confirm this relationship (SI). Whether  
457 wind pollination preceded and enabled angiosperm shifts to arid, open, extra-tropical habitats or  
458 evolved in response to these shifts remains an open question, though the numerous animal

459 pollinated taxa in similar habitats suggest that wind pollination is not a precondition for such  
460 shifts.

461

#### 462 4.2 Transition timing

463

464 The age of angiosperms remains highly controversial, and the evolutionary times presented here  
465 are one amongst many possible scenarios which diverge by up to 130 million years (Sauquet *et*  
466 *al.*, 2022). Thus the timing of pollination shifts through angiosperm history remain highly  
467 uncertain, though fossil flowers, pollen and pollinators can provide some evidence (Friis *et al.*,  
468 2011). Fossil evidence for insect-angiosperm pollination extends as far back as the mid-  
469 Cretaceous (99 mya, Bao *et al.*, 2019). Our models suggest the first shifts to wind pollination  
470 leading to major wind pollinated lineages occurred between 130-80 mya (Figure 3a, 4a). Fossil  
471 pollen supports angiosperm wind pollination since at least the Cenomanian (~100-95 mya, Hu *et*  
472 *al.*, 2008), and early shifts to wind pollination could have been spurred by major climatic  
473 disruptions to pollinators throughout the Cretaceous (e.g. Linnert *et al.*, 2014). Our  
474 reconstruction suggests the first shift to vertebrate pollination occurred approximately 126-127  
475 mya, significantly earlier than fossil evidence for specialised bird or bat interactions with  
476 flowers. The earliest evidence for flower visiting behaviour in a bird dates back to the Eocene 48  
477 mya (Mayr & Wilde, 2014), and the oldest nectar feeding bat family (Pteropodidae) originated  
478 approximately 56 mya (Fleming *et al.*, 2009). Specialised vertebrate pollinators were likely  
479 preceded by generalist, opportunistic flower visitors, but how far back generalist vertebrate  
480 pollination extends may be difficult to determine, especially given larger, vertebrate pollinated  
481 flowers are less likely to be preserved in the fossil record.

482

#### 483 4.3 Limitations and future directions

484

485 We provide here an overview of major evolutionary patterns of pollination across the  
486 angiosperms. Trait-independent subsampling of the phylogeny allows us to characterise patterns  
487 independent of possible biases in the literature (e.g. Adamo *et al.*, 2021), and any patterns  
488 observed, such as the low number of transitions to water pollination, are likely a subset of the  
489 patterns that would emerge from denser sampling. We envision future work will add detail to our

490 broad overview, especially as the phylogeny of angiosperms becomes ever more resolved.  
491 Moreover, our understanding of angiosperm pollination depends on the fundamental work of  
492 pollination ecologists to document complex and sometimes cryptic pollination systems.  
493 Thorough pollination studies that explicitly test for cryptic pollination mechanisms including  
494 selfing and ambophily are still needed in many angiosperm families (Ollerton, 2017;  
495 Abrahamczyk *et al.*, 2022a). Further pollination studies will enable us to more fully understand  
496 the diversity and macroevolutionary dynamics of pollination systems globally.

497

## 498 **CONCLUSION**

499

500 The mutualistic relationship between angiosperms and insect pollinators is likely ancestral and  
501 has been maintained for approximately 86% of angiosperm evolutionary history. Moreover, with  
502 at least 89% of contemporary angiosperm families insect pollinated, the relationship between  
503 plants and insect pollinators is clearly important to plant reproduction and persistence today.  
504 How pollination will continue in the Anthropocene remains to be seen.

505

## 506 **Data availability**

507

508 All data and R code needed to re-create analyses are available on GitHub at  
509 <https://github.com/rubysaltbush/pollination-macroevo> and at  
510 <https://doi.org/10.5281/zenodo.7592528>.

511

## 512 **Acknowledgements**

513

514 We thank Santiago Ramírez-Barahona for providing superbiome occupancy data and the  
515 posterior trees for stochastic mapping. We are grateful to A. López-Martínez, J. Baczyński and J.  
516 Herting for help with macroevolutionary and data visualisation methods, and to the Sauquet lab  
517 for many stimulating discussions about macroevolution, flowers and pollination. R.E.S. was  
518 supported by funding through the Australian Government's Research Training Program.

519

## 520 **Competing interests**

521

522 The authors declare no conflict of interest.

523

524 **Author contributions**

525

526 R.E.S., H.S. and R.V.G. conceived the project; R.E.S. and L.D. assembled the pollination data;

527 W.C. assisted with geographic data and analyses. R.E.S. analysed the data; R.E.S. led the writing

528 with assistance and review from all other authors.

529 **References**

530

531 **Abrahamczyk S, Struck J-H, Weigend M. 2022a.** The best of two worlds: ecology and evolution  
532 of ambophilous plants. *Biological Reviews*.

533 **Abrahamczyk S, Weigend M, Becker K, Dannenberg LS, Eberz J, Atella-Hödtke N, Steudel B.**  
534 **2022b.** Influence of plant reproductive systems on the evolution of hummingbird pollination.  
535 *Ecology and Evolution* **12**: e8621.

536 **Ackerman JD. 2000.** Abiotic pollen and pollination: Ecological, functional, and evolutionary  
537 perspectives. *Plant Systematics and Evolution* **222**: 167–185.

538 **Adamo M, Chialva M, Calevo J, Bertoni F, Dixon K, Mammola S. 2021.** Plant scientists' research  
539 attention is skewed towards colourful, conspicuous and broadly distributed flowers. *Nature*  
540 *Plants* **7**: 574–578.

541 **Asar Y, Ho SYW, Sauquet H. 2022.** Early diversifications of angiosperms and their insect  
542 pollinators: were they unlinked? *Trends in Plant Science*: S136013852200108X.

543 **Bao T, Wang B, Li J, Dilcher D. 2019.** Pollination of Cretaceous flowers. *Proceedings of the*  
544 *National Academy of Sciences* **116**: 24707–24711.

545 **Barrett SCH. 2013.** The evolution of plant reproductive systems: how often are transitions  
546 irreversible? *Proceedings of the Royal Society B: Biological Sciences* **280**: 20130913.

547 **Boyko JD, Beaulieu JM. 2021.** Generalized hidden Markov models for phylogenetic comparative  
548 datasets. *Methods in Ecology and Evolution* **12**: 468–478.

549 **Culley TM, Weller SG, Sakai AK. 2002.** The evolution of wind pollination in angiosperms. *Trends*  
550 *in Ecology & Evolution* **17**: 361–369.

551 **Darwin C. 1876.** *The Effects of Cross & Self-Fertilisation in the Vegetable Kingdom*. London: John  
552 Murray.

- 553 **Dellinger AS. 2020.** Pollination syndromes in the 21st century: where do we stand and where  
554 may we go? *New Phytologist*: nph.16793.
- 555 **eFloras. 2022.** eFloras. Missouri Botanical Garden, St. Louis, MO & Harvard University Herbaria,  
556 Cambridge, MA. URL <http://www.efloras.org>. [accessed 2021-2022].
- 557 **Faegri K, van der Pijl L. 1979.** *Principles of Pollination Ecology*. Pergamon Press.
- 558 **Falster D, Gallagher R, Wenk EH, Wright IJ, Indiarto D, Andrew SC, Baxter C, Lawson J, Allen S,**  
559 **Fuchs A, et al. 2021.** AusTraits, a curated plant trait database for the Australian flora. *Scientific*  
560 *Data* **8**: 254.
- 561 **Fang H, Baret F, Plummer S, Schaeppman-Strub G. 2019.** An Overview of Global Leaf Area Index  
562 (LAI): Methods, Products, Validation, and Applications. *Reviews of Geophysics* **57**: 739–799.
- 563 **Fleming TH, Geiselman C, Kress WJ. 2009.** The evolution of bat pollination: a phylogenetic  
564 perspective. *Annals of Botany* **104**: 1017–1043.
- 565 **Friedman J, Barrett SCH. 2008.** A Phylogenetic Analysis of the Evolution of Wind Pollination in  
566 the Angiosperms. *International Journal of Plant Sciences* **169**: 49–58.
- 567 **Friedman J, Barrett SCH. 2009.** Wind of change: new insights on the ecology and evolution of  
568 pollination and mating in wind-pollinated plants. *Annals of Botany* **103**: 1515–1527.
- 569 **Friis EM, Crane PR, Pedersen KR. 2011.** History and evolution of pollination in angiosperms. In:  
570 Early flowers and angiosperm evolution. Cambridge University Press.
- 571 **GBIF.org. 2022.** GBIF Occurrence Download. URL <https://doi.org/10.15468/dl.qzwbba>.  
572 [accessed 16 June 2022].
- 573 **Gottsberger G. 2016.** Generalist and specialist pollination in basal angiosperms (ANITA grade,  
574 basal monocots, magnoliids, Chloranthaceae and Ceratophyllaceae): what we know now \*.  
575 *Plant Diversity and Evolution* **131**: 263–362.



- 576 **Grüter C, Ratnieks FLW. 2011.** Flower constancy in insect pollinators: Adaptive foraging  
577 behaviour or cognitive limitation? *Communicative & Integrative Biology* **4**: 633–636.
- 578 **Hu S, Dilcher DL, Jarzen DM, Winship Taylor D. 2008.** Early steps of angiosperm pollinator  
579 coevolution. *Proceedings of the National Academy of Sciences* **105**: 240–245.
- 580 **iNaturalist. 2022.** iNaturalist. URL <https://www.inaturalist.org>. [accessed 2021-2022].
- 581 **Ives AR, Garland T Jr. 2010.** Phylogenetic Logistic Regression for Binary Dependent Variables.  
582 *Systematic Biology* **59**: 9–26.
- 583 **Kattge J, Bönisch G, Díaz S, Lavorel S, Prentice IC, Leadley P, Tautenhahn S, Werner GDA,**  
584 **Aakala T, Abedi M, et al. 2020.** TRY plant trait database – enhanced coverage and open access.  
585 *Global Change Biology* **26**: 119–188.
- 586 **Kessler M, Abrahamczyk S, Krömer T. 2020.** The role of hummingbirds in the evolution and  
587 diversification of Bromeliaceae: unsupported claims and untested hypotheses. *Botanical*  
588 *Journal of the Linnean Society* **192**: 592–608.
- 589 **Kubitzki K, Rohwer JG, Bittrich V, Bayer C, Kadereit JW, Jeffrey C, Kellogg EA, Kuijt J, Hansen B**  
590 **(Eds.). 1993–2018.** *The Families and Genera of Vascular Plants*. Berlin, Heidelberg: Springer.
- 591 **Kühn I, Durka W, Klotz S. 2004.** BioFlor: A New Plant-Trait Database as a Tool for Plant Invasion  
592 Ecology. *Diversity and Distributions* **10**: 363–365.
- 593 **Labandeira CC, Currano ED. 2013.** The Fossil Record of Plant-Insect Dynamics. *Annual Review of*  
594 *Earth and Planetary Sciences* **41**: 287–311.
- 595 **Linder HP. 1998.** Morphology and the evolution of wind pollination. In: Owens SJ, Rudall PJ,  
596 eds. *Reproductive Biology*. Royal Botanic Gardens, Kew, 123–135.
- 597 **Linnert C, Robinson SA, Lees JA, Bown PR, Pérez-Rodríguez I, Petrizzo MR, Falzoni F, Littler K,**  
598 **Arz JA, Russell EE. 2014.** Evidence for global cooling in the Late Cretaceous. *Nature*  
599 *Communications* **5**: 4194.

- 600 **Liu Y, Liu R, Chen JM. 2012.** Retrospective retrieval of long-term consistent global leaf area  
601 index (1981–2011) from combined AVHRR and MODIS data. *Journal of Geophysical Research:*  
602 *Biogeosciences* **117**.
- 603 **Mayr G, Wilde V. 2014.** Eocene fossil is earliest evidence of flower-visiting by birds. *Biology*  
604 *Letters* **10**: 20140223.
- 605 **McCallum KP, McDougall FO, Seymour RS. 2013.** A review of the energetics of pollination  
606 biology. *Journal of Comparative Physiology B* **183**: 867–876.
- 607 **McEwen JR, Vamosi JC. 2010.** Floral colour versus phylogeny in structuring subalpine flowering  
608 communities. *Proceedings of the Royal Society B: Biological Sciences* **277**: 2957–2965.
- 609 **van der Niet T. 2021.** Paucity of natural history data impedes phylogenetic analyses of  
610 pollinator-driven evolution. *New Phytologist* **229**: 1201–1205.
- 611 **van der Niet T, Johnson SD. 2012.** Phylogenetic evidence for pollinator-driven diversification of  
612 angiosperms. *Trends in Ecology & Evolution* **27**: 353–361.
- 613 **van der Niet T, Peakall R, Johnson SD. 2014.** Pollinator-driven ecological speciation in plants:  
614 new evidence and future perspectives. *Annals of Botany* **113**: 199–212.
- 615 **Ollerton J. 2017.** Pollinator Diversity: Distribution, Ecological Function, and Conservation.  
616 *Annual Review of Ecology, Evolution, and Systematics* **48**: 353–376.
- 617 **Ollerton J, Alarcón R, Waser NM, Price MV, Watts S, Cranmer L, Hingston A, Peter CI,**  
618 **Rotenberry J. 2009.** A global test of the pollination syndrome hypothesis. *Annals of Botany* **103**:  
619 1471–1480.
- 620 **Ollerton J, Liede-Schumann S, Endress ME, Meve U, Rech AR, Shuttleworth A, Keller HA,**  
621 **Fishbein M, Alvarado-Cárdenas LO, Amorim FW, et al. 2019.** The diversity and evolution of  
622 pollination systems in large plant clades: Apocynaceae as a case study. *Annals of Botany* **123**:  
623 311–325.

- 624 **Ollerton J, Winfree R, Tarrant S. 2011.** How many flowering plants are pollinated by animals?  
625 *Oikos* **120**: 321–326.
- 626 **Pagel M. 1994.** Detecting Correlated Evolution on Phylogenies: A General Method for the  
627 Comparative Analysis of Discrete Characters. *Proceedings: Biological Sciences* **255**: 37–45.
- 628 **Parachnowitsch AL, Manson JS, Sletvold N. 2019.** Evolutionary ecology of nectar. *Annals of*  
629 *Botany* **123**: 247–261.
- 630 **Paradis E, Schliep K. 2019.** ape 5.0: an environment for modern phylogenetics and evolutionary  
631 analyses in R. *Bioinformatics* **35**: 526–528.
- 632 **Pritchard DJ, Vallejo-Marín M. 2020.** Buzz pollination. *Current Biology* **30**: R858–R860.
- 633 **R Core Team. 2022.** R: A language and environment for statistical computing, v4.1.3. Vienna,  
634 Austria: R foundation for Statistical Computing. URL <http://www.r-project.org>.
- 635 **Ramírez-Barahona S, Sauquet H, Magallón S. 2020.** The delayed and geographically  
636 heterogeneous diversification of flowering plant families. *Nature Ecology & Evolution* **4**.
- 637 **Ratto F, Simmons BI, Spake R, Zamora-Gutierrez V, MacDonald MA, Merriman JC, Tremlett CJ,**  
638 **Poppy GM, Peh KS-H, Dicks LV. 2018.** Global importance of vertebrate pollinators for plant  
639 reproductive success: a meta-analysis. *Frontiers in Ecology and the Environment* **16**: 82–90.
- 640 **Rech AR, Dalsgaard B, Sandel B, Sonne J, Svenning J-C, Holmes N, Ollerton J. 2016.** The  
641 macroecology of animal versus wind pollination: ecological factors are more important than  
642 historical climate stability. *Plant Ecology & Diversity* **9**: 253–262.
- 643 **Revell LJ. 2012.** phytools: an R package for phylogenetic comparative biology (and other things).  
644 *Methods in Ecology and Evolution* **3**: 217–223.
- 645 **Rodger JG, Bennett JM, Razanajatovo M, Knight TM, van Kleunen M, Ashman T-L, Steets JA,**  
646 **Hui C, Arceo-Gómez G, Burd M, et al. 2021.** Widespread vulnerability of flowering plant seed  
647 production to pollinator declines. *Science Advances* **7**: eabd3524.

- 648 **Rosas-Guerrero V, Aguilar R, Martén-Rodríguez S, Ashworth L, Lopezaraiza-Mikel M, Bastida**  
649 **JM, Quesada M. 2014.** A quantitative review of pollination syndromes: do floral traits predict  
650 effective pollinators? (R Irwin, Ed.). *Ecology Letters* **17**: 388–400.
- 651 **Saunders ME. 2018.** Insect pollinators collect pollen from wind-pollinated plants: implications  
652 for pollination ecology and sustainable agriculture. *Insect Conservation and Diversity* **11**: 13–31.
- 653 **Sauquet H, von Balthazar M, Magallón S, Doyle JA, Endress PK, Bailes EJ, Barroso de Morais E,**  
654 **Bull-Hereñu K, Carrive L, Chartier M, et al. 2017.** The ancestral flower of angiosperms and its  
655 early diversification. *Nature Communications* **8**: 16047.
- 656 **Sauquet H, Magallón S. 2018.** Key questions and challenges in angiosperm macroevolution.  
657 *New Phytologist* **219**: 1170–1187.
- 658 **Sauquet H, Ramírez-Barahona S, Magallón S. 2022.** What is the age of flowering plants?  
659 *Journal of Experimental Botany*: erac130.
- 660 **Specht CD, Yockteng R, Almeida AM, Kirchoff BK, Kress WJ. 2012.** Homoplasy, Pollination, and  
661 Emerging Complexity During the Evolution of Floral Development in the Tropical Gingers  
662 (Zingiberales). *The Botanical Review* **78**: 440–462.
- 663 **Taylor ML, Macfarlane TD, Williams JH. 2010.** Reproductive ecology of the basal angiosperm  
664 *Trithuria submersa* (Hydatellaceae). *Annals of Botany* **106**: 909–920.
- 665 **Thien LB, Bernhardt P, Devall MS, Chen Z, Luo Y, Fan J-H, Yuan L-C, Williams JH. 2009.**  
666 Pollination biology of basal angiosperms (ANITA grade). *American Journal of Botany* **96**: 166–  
667 182.
- 668 **Thien LB, Sage TL, Jaffré T, Bernhardt P, Pontieri V, Weston PH, Malloch D, Azuma H, Graham**  
669 **SW, McPherson MA, et al. 2003.** The Population Structure and Floral Biology of *Amborella*  
670 *trichopoda* (Amborellaceae). *Annals of the Missouri Botanical Garden* **90**: 466–490.

- 671 **Tung Ho L si, Ané C. 2014.** A Linear-Time Algorithm for Gaussian and Non-Gaussian Trait  
672 Evolution Models. *Systematic Biology* **63**: 397–408.
- 673 **Valdivia CE, Simonetti JA, Henríquez CA. 2006.** Depressed Pollination of *Lapageria rosea* Ruiz et  
674 Pav. (Philesiaceae) in the Fragmented Temperate Rainforest of Southern South America.  
675 *Biodiversity & Conservation* **15**: 1845–1856.
- 676 **Wang Y, Luo A, Lyu T, Dimitrov D, Xu X, Freckleton RP, Li Y, Su X, Li Y, Liu Y, et al. 2021.** Global  
677 distribution and evolutionary transitions of angiosperm sexual systems. *Ecology Letters* **24**:  
678 1835–1847.
- 679 **Waser NM, Chittka L, Price MV, Williams NM, Ollerton J. 1996.** Generalization in Pollination  
680 Systems, and Why it Matters. *Ecology* **77**: 1043–1060.
- 681 **Wessinger CA. 2021.** From pollen dispersal to plant diversification: genetic consequences of  
682 pollination mode. *New Phytologist* **229**: 3125–3132.
- 683 **Wickham H, Averick M, Bryan J, Chang W, McGowan LD, François R, Golemund G, Hayes A,  
684 Henry L, Hester J, et al. 2019.** Welcome to the Tidyverse. *Journal of Open Source Software* **4**:  
685 1686.
- 686 **Wragg PD, Johnson SD. 2011.** Transition from wind pollination to insect pollination in sedges:  
687 experimental evidence and functional traits. *New Phytologist* **191**: 1128–1140.
- 688 **Xiao L, Labandeira C, Dilcher D, Ren D. 2021.** Florivory of Early Cretaceous flowers by  
689 functionally diverse insects: implications for early angiosperm pollination. *Proceedings of the  
690 Royal Society B: Biological Sciences* **288**: 20210320.
- 691 **Yang Z. 2006.** *Computational Molecular Evolution*. OUP Oxford.
- 692 **Zizka A, Silvestro D, Andermann T, Azevedo J, Duarte Ritter C, Edler D, Farooq H, Herdean A,  
693 Ariza M, Scharn R, et al. 2019.** CoordinateCleaner: Standardized cleaning of occurrence records  
694 from biological collection databases. *Methods in Ecology and Evolution* **10**: 744–751.

695

696 **The following Supporting Information is available for this article:**

697

698 **Fig. S1** Tall phylogeny showing the macroevolution of pollination modes across angiosperms.

699 **Fig. S2** Transitions to wind, water, vertebrate and insect pollination across 1000 simulations.

700 **Fig. S3** Species latitude versus Leaf Area Index, coloured by superbiome occupancy.

701

702 **Table S1** Ancestral State Reconstruction models for different pollination mode categorisations.

703 **Table S2** Number of transitions between pollination states for main tree versus posterior trees.

704 **Table S3** Proportion tree time in pollination states for main tree versus posterior trees.

705 **Table S4** Number of species sampled by pollination mode and superbiome.

706 **Table S5** Model results for correlated evolution between pollination and superbiomes.

707

708 **Notes S1** Testing for correlated evolution between pollination mode and superbiome occupancy.
